# Supplementary material for: Control of Brushless Direct-Current Motors Using Bioelectric EMG Signals
Source: MDPI journal article supplement (doi:10.3390/s22186829), 2022-09-09

**Supplementary S1.** Diagram of data acquisition; communication handling circuit diagram; diagram of a symmetrical power supply circuit

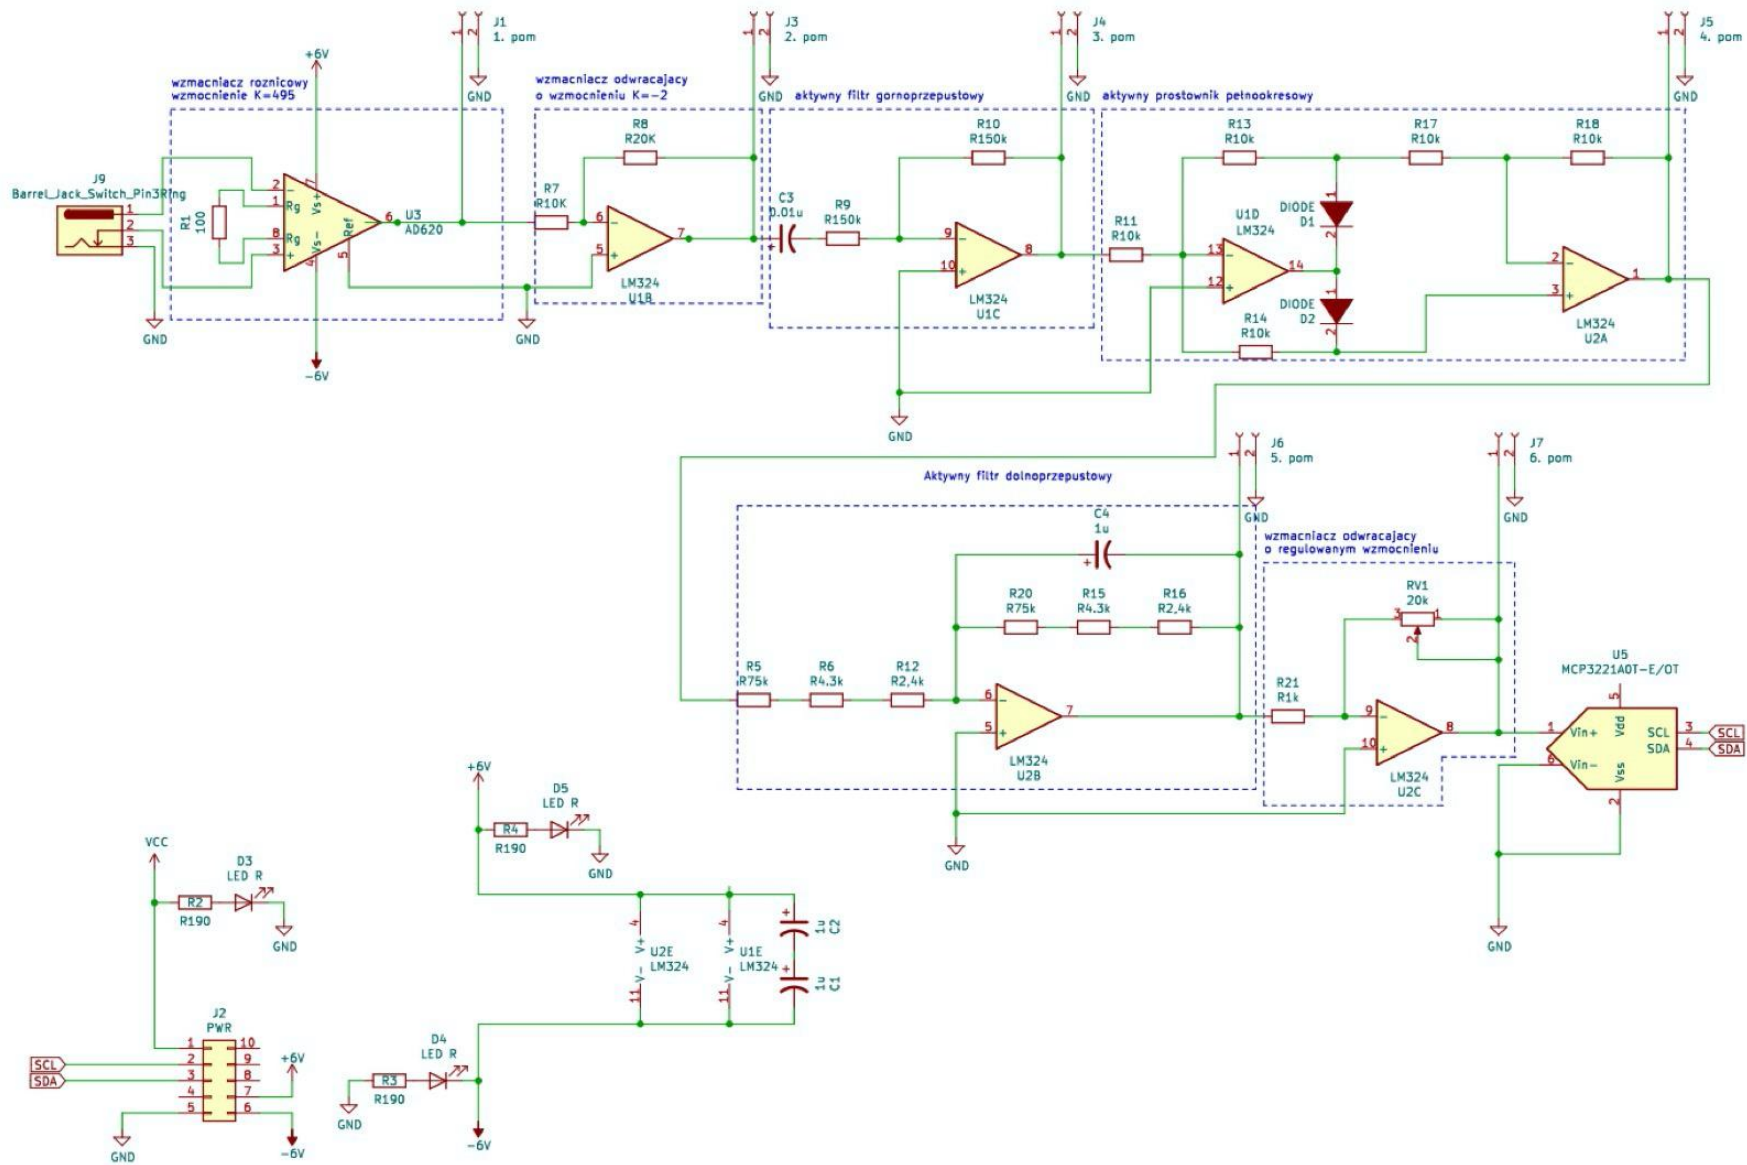

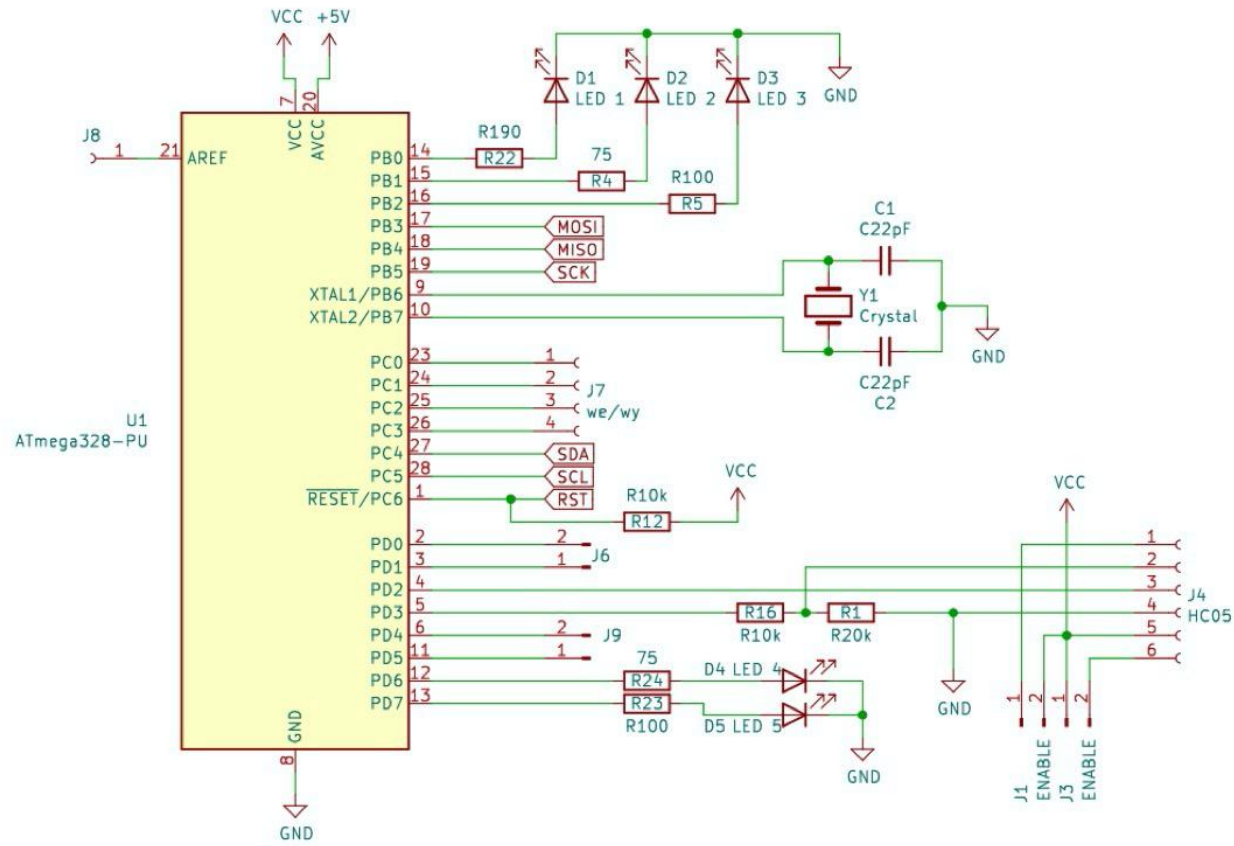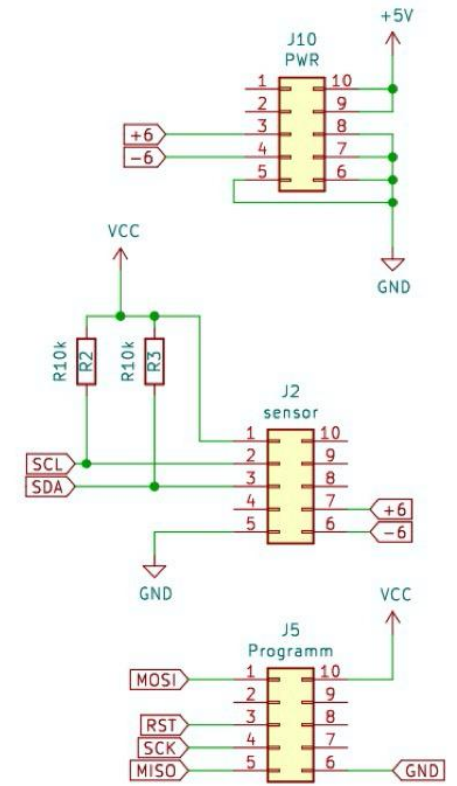

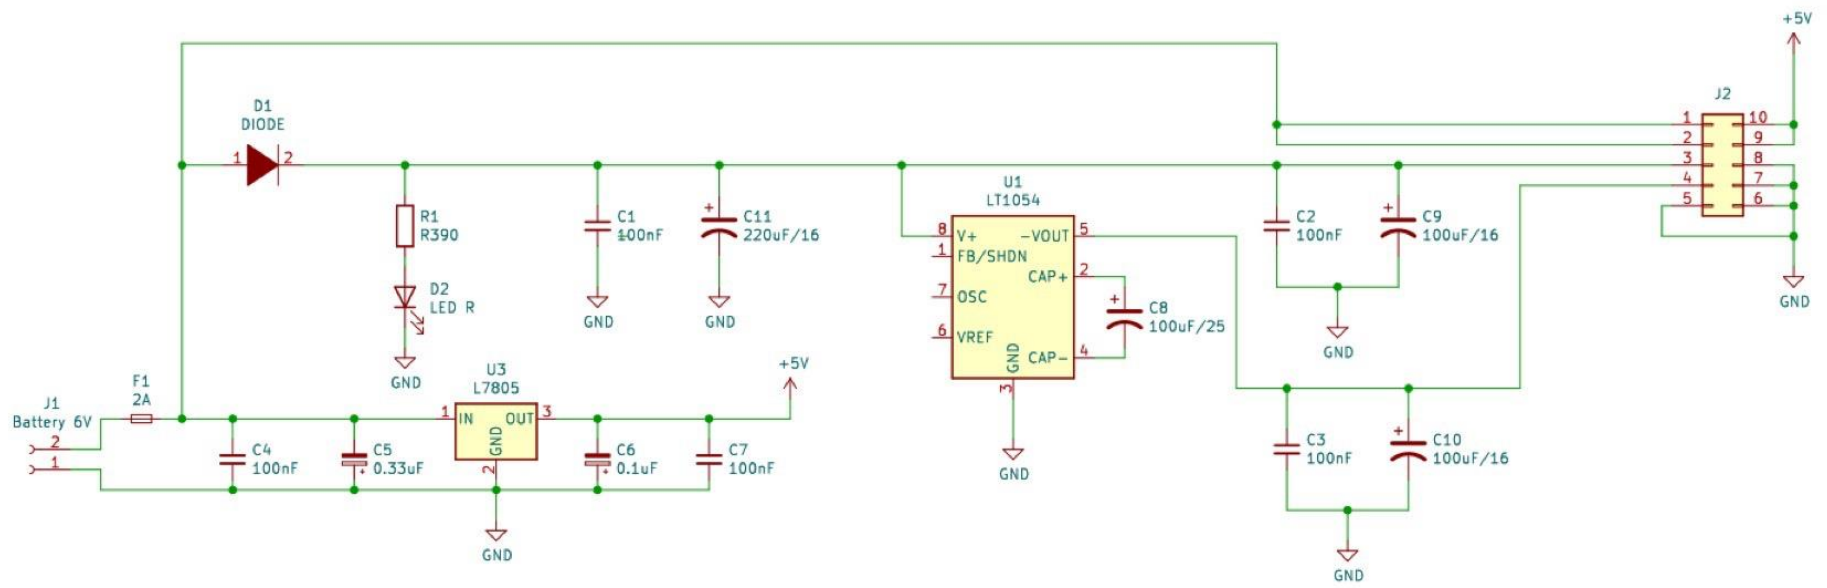

**Supplementary S2.** Diagrams of designed electric circuits of the BLDC motor control system made in the KiCad environment

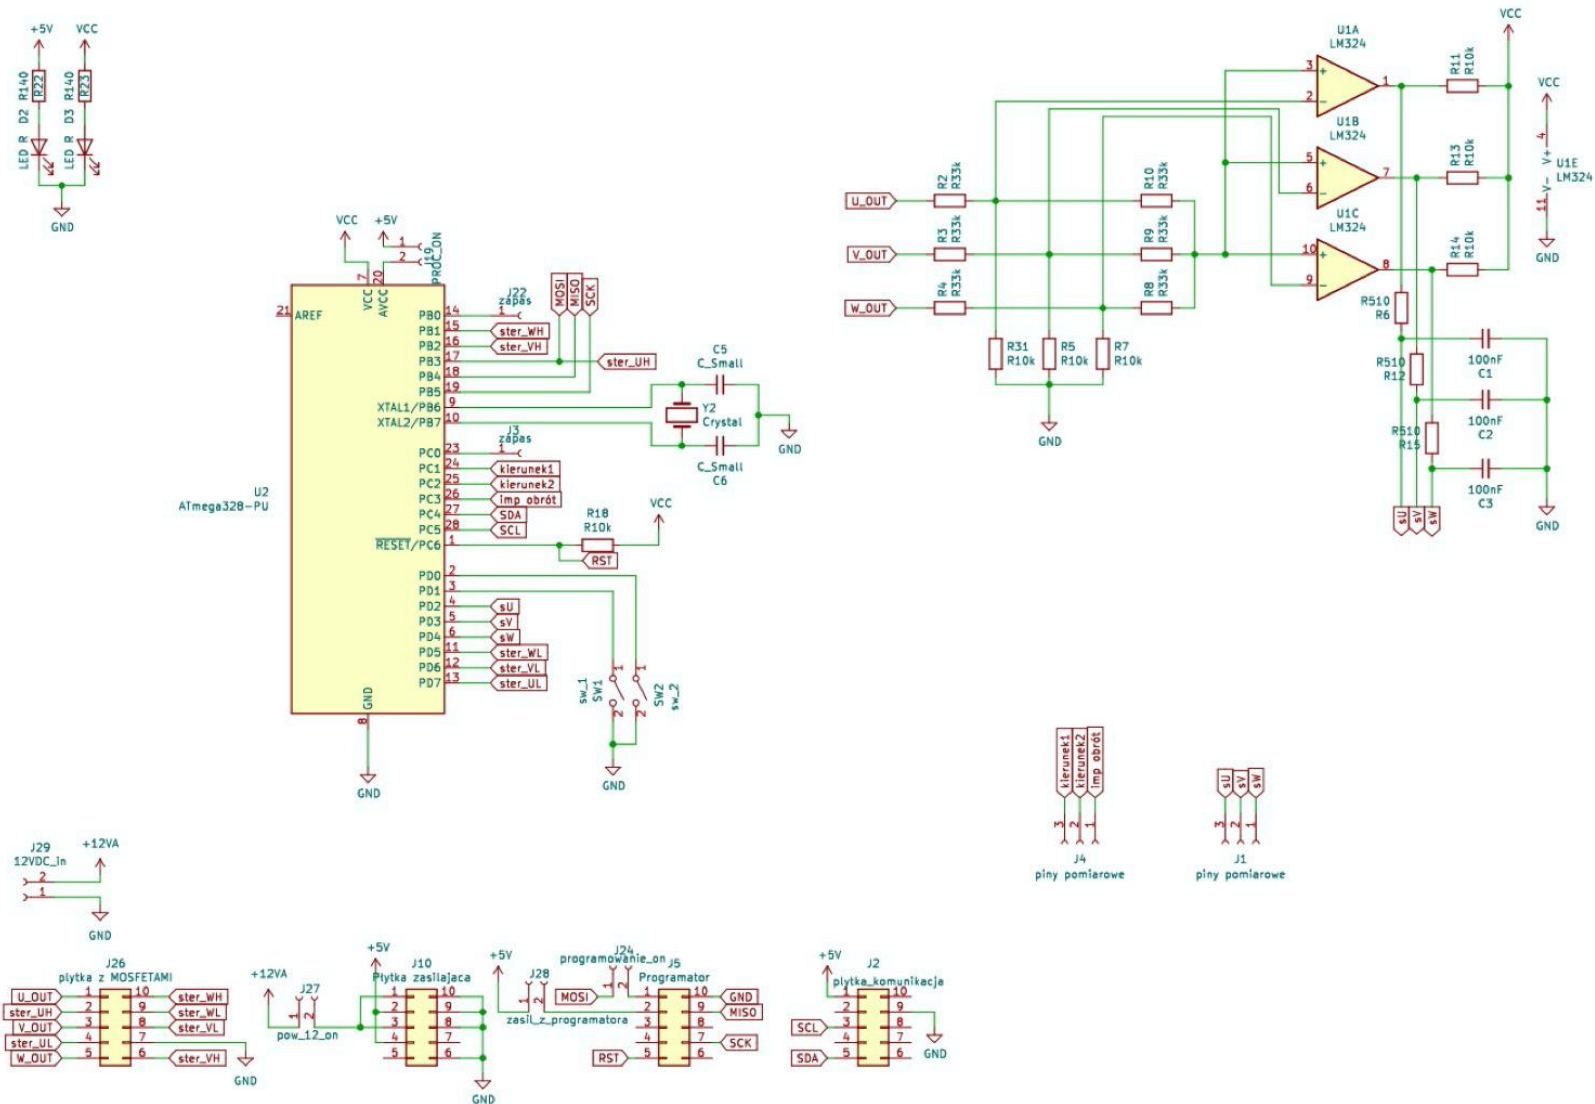

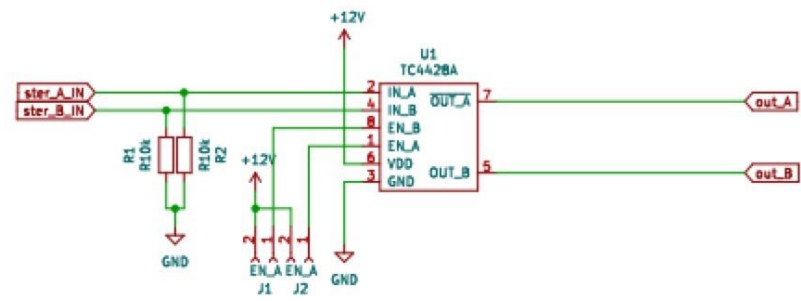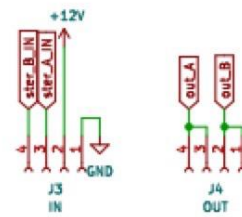

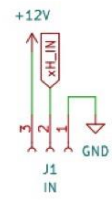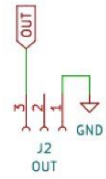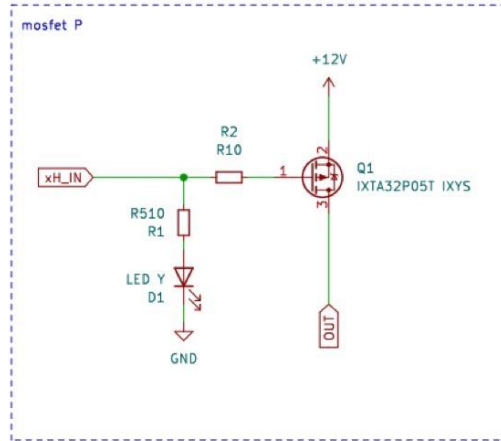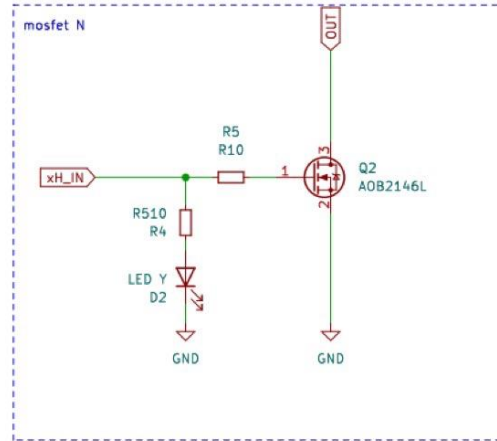

Supplement: s1 [file s1]
